# Supplementary material
Source: ML conference proceedings conference paper supplement (https://aclanthology.org/2024.semeval-1.202)

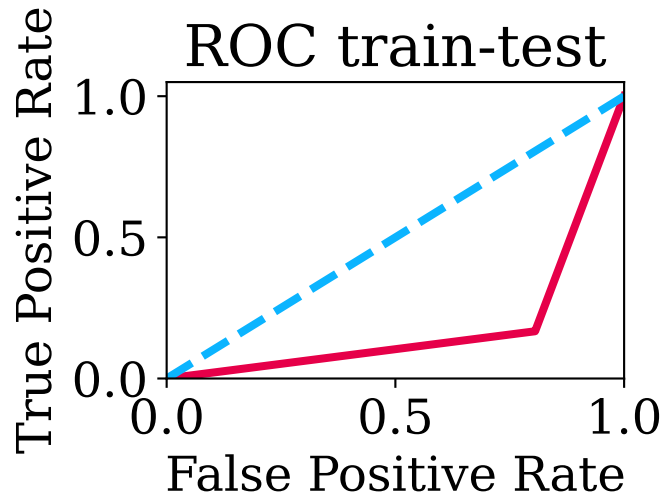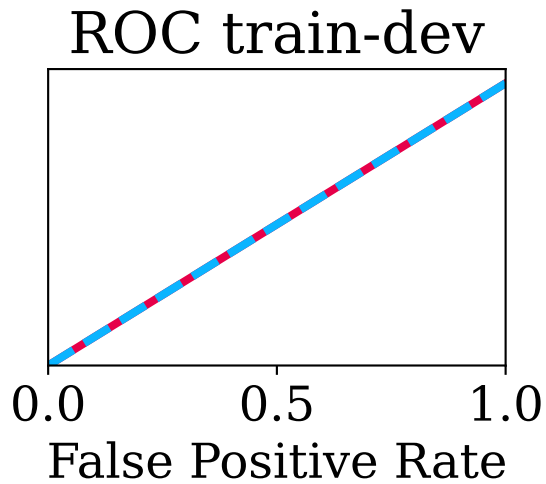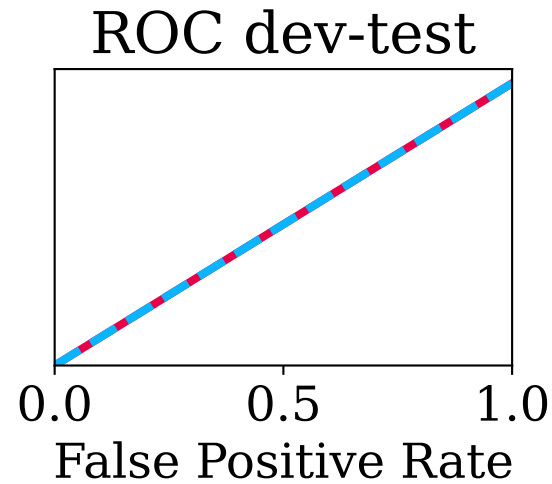

Supplement: SupplementaryMaterial [file 2024.semeval-1.202.SupplementaryMaterial.zip]

tel (Train)

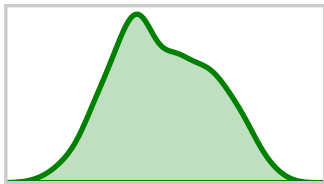

tel (Dev)

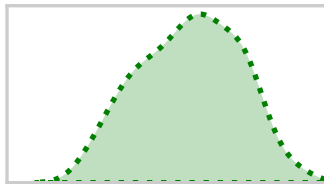

tel (Test)

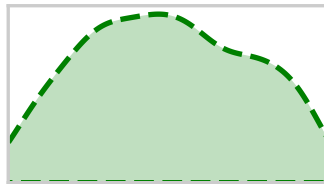

0.0

0.5

1.0

0.0

0.5

1.0

0.0

0.5

1.0

Supplement: SupplementaryMaterial [file 2024.semeval-1.202.SupplementaryMaterial.zip]

ROC eng (train-dev)

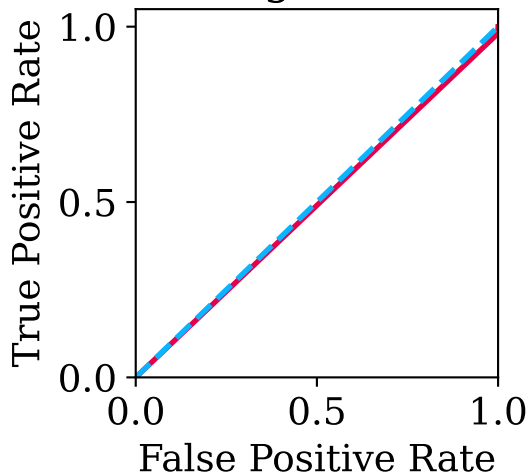

ROC mar (train-dev)

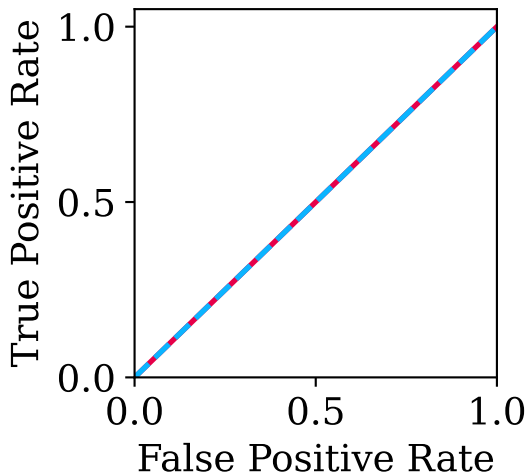

ROC tel (train-dev)

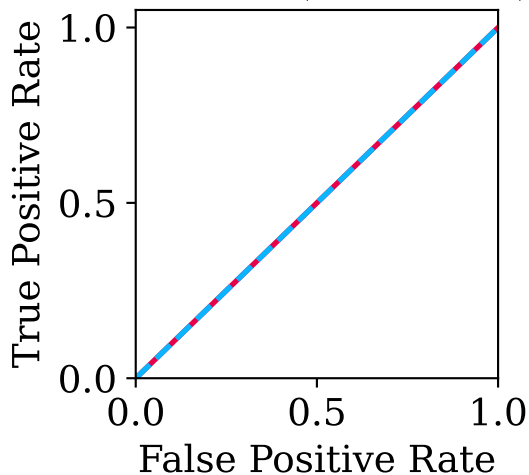

ROC ary (train-dev)

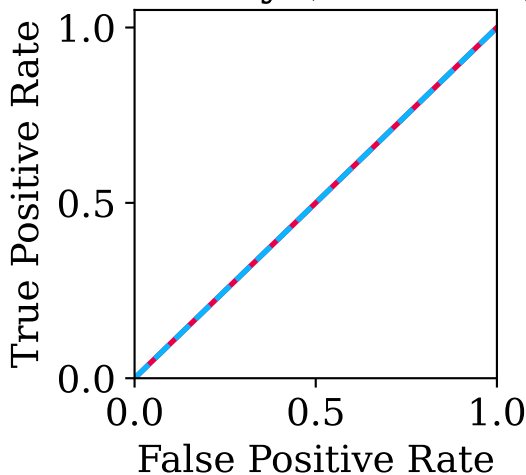

Supplement: SupplementaryMaterial [file 2024.semeval-1.202.SupplementaryMaterial.zip]

eng (Train)

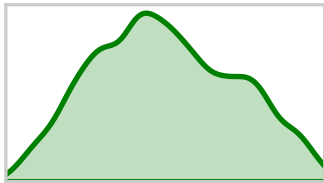

0.0 0.5 1.0

eng (Dev)

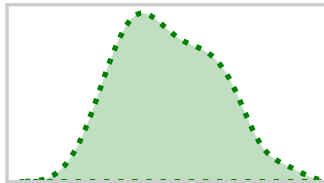

0.0 0.5 1.0

eng (Test)

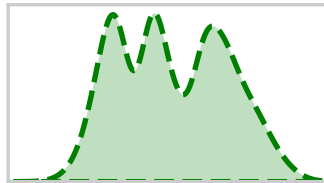

0.0 0.5 1.0

Supplement: SupplementaryMaterial [file 2024.semeval-1.202.SupplementaryMaterial.zip]

ROC curve for eng

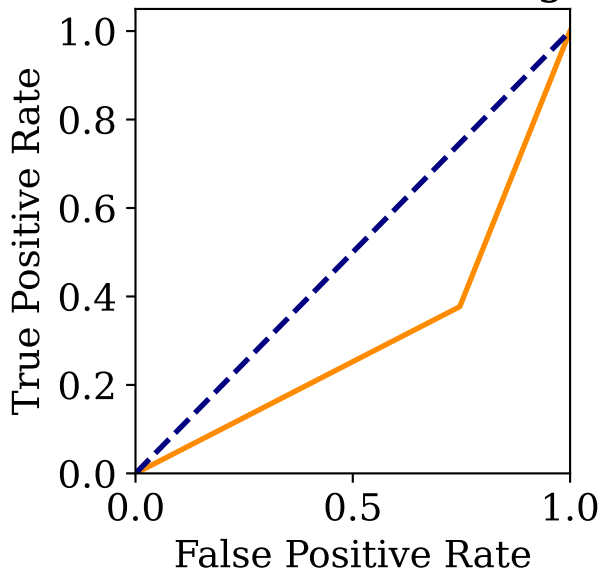

ROC curve for mar

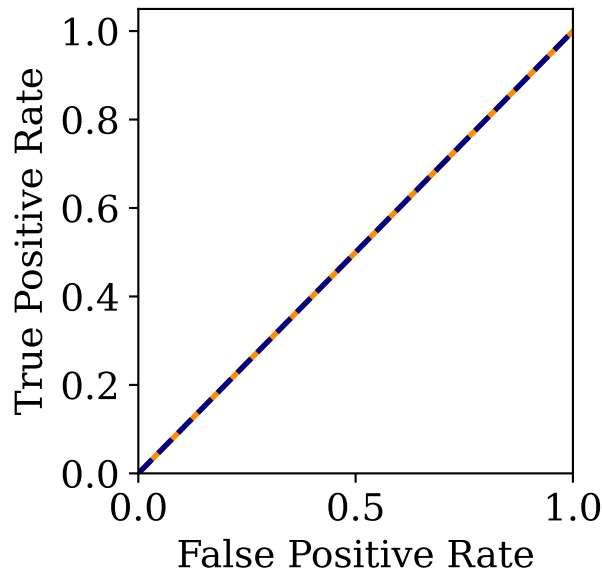

ROC curve for tel

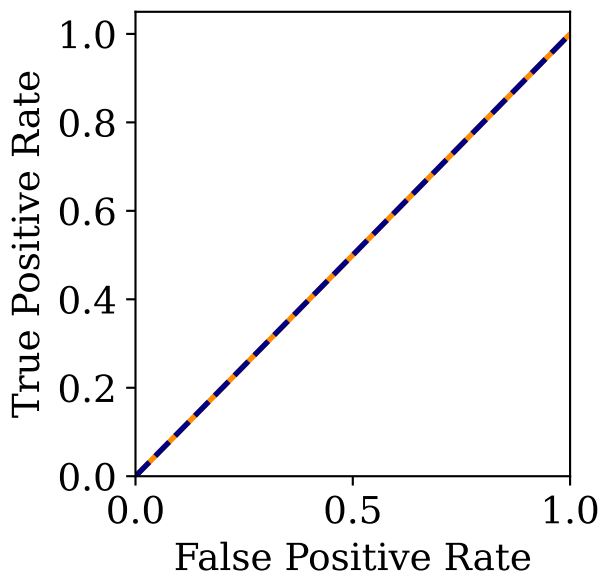

ROC curve for ary

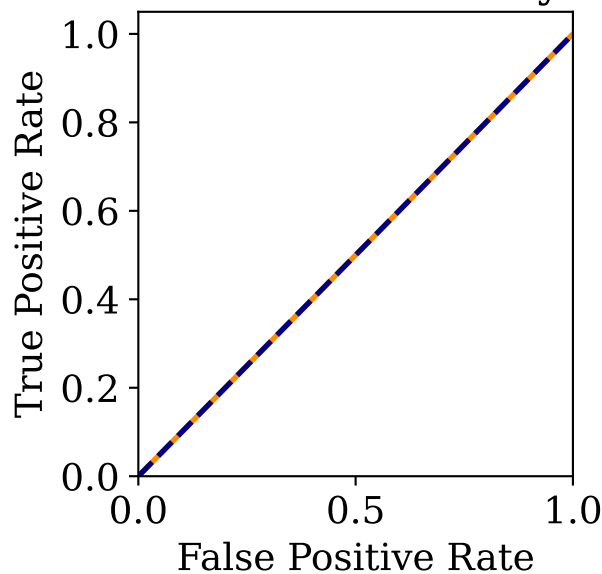

Supplement: SupplementaryMaterial [file 2024.semeval-1.202.SupplementaryMaterial.zip]

mar (Train)

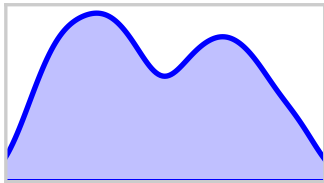

0.0 0.5 1.0

mar (Dev)

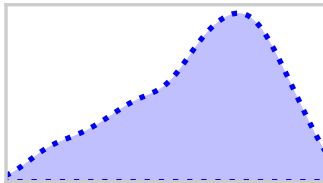

0.0 0.5 1.0

mar (Test)

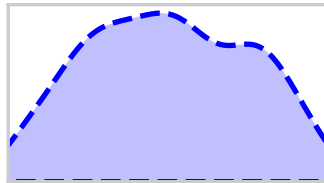

0.0 0.5 1.0

Supplement: SupplementaryMaterial [file 2024.semeval-1.202.SupplementaryMaterial.zip]

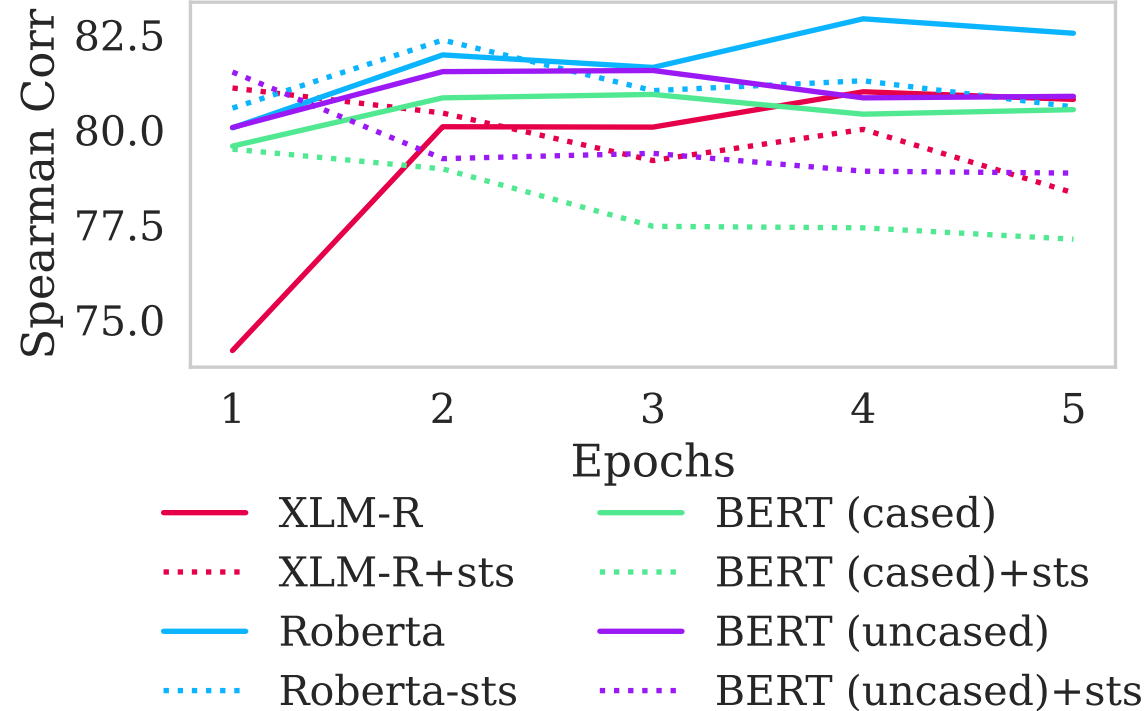

Supplement: SupplementaryMaterial [file 2024.semeval-1.202.SupplementaryMaterial.zip]

ROC eng (train-test)

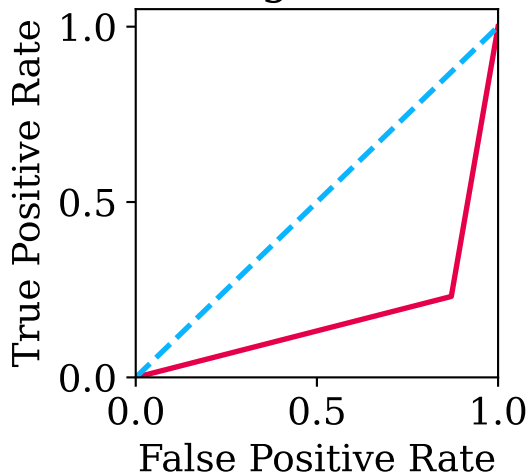

ROC mar (train-test)

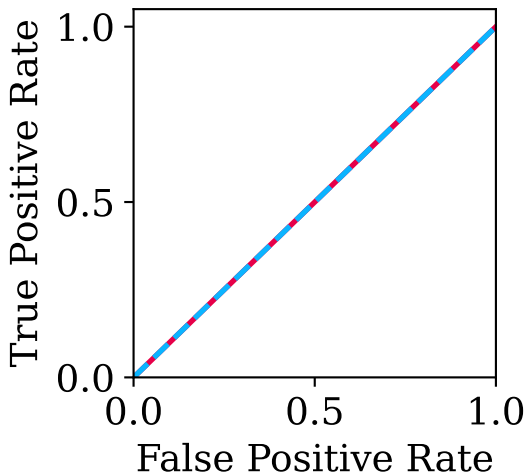

ROC tel (train-test)

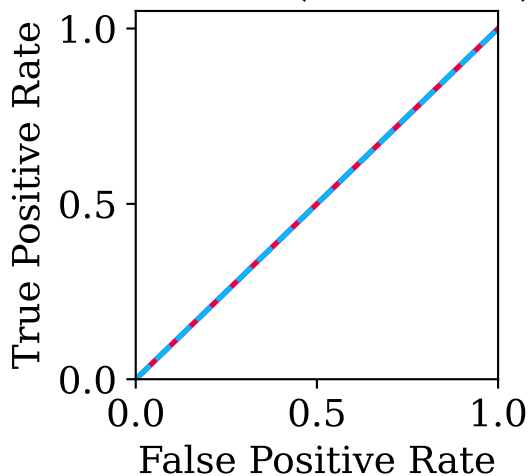

ROC ary (train-test)

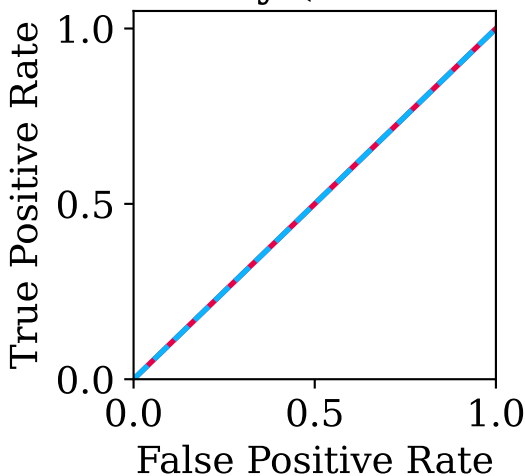

Supplement: SupplementaryMaterial [file 2024.semeval-1.202.SupplementaryMaterial.zip]

ary (Train)

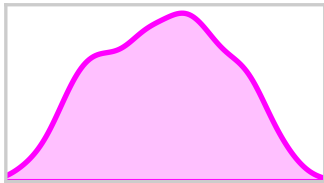

0.0 0.5 1.0

ary (Dev)

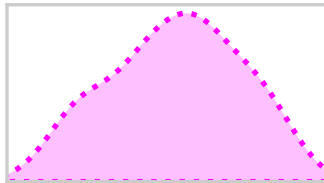

0.0 0.5 1.0

ary (Test)

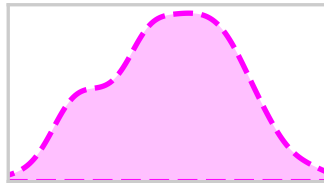

0.0 0.5 1.0

Supplement: SupplementaryMaterial [file 2024.semeval-1.202.SupplementaryMaterial.zip]
